# Supplementary material for: CYP27A1 Loss Dysregulates Cholesterol Homeostasis in Prostate Cancer
Source: Oxford University Press journal article supplement (doi:10.1158/0008-5472.can-16-2738), 2017-01-27
Supplement: 00085472can162738-sup-172796_1_supp_3809023_4j9y07.docx [file 00085472can162738-sup-172796_1_supp_3809023_4j9y07.docx]

**Supplementary Figure S1.** **LDL enhances PC cell growth and *CYP27A1* expression levels in different stages of PC**

**A)** VCaP cells were plated in 96-well plates in LPDS or full serum (FBS). The next day, cells plated in LPDS were either treated with LPDS alone or in combination with LDL (0.25 mg/ml). The cells were then harvested at the indicated days for quantification of DNA content via staining with the DNA dye Hoechst 33258. The data shown are representative of three independent experiments. **B)** 22RV1 or **C)** DU145 cells were plated in LPDS for twenty-four hours. The next day the cells were treated with LPDS alone or in combination with LDL (0.25 mg/ml). The cells were then harvested at the indicated days and the final DNA content measured as in A. **D)** *CYP27A1* expression levels were downloaded from six different datasets and graphed using boxplots. Significant differences in *CYP27A1* mRNA levels between different stages of prostate cancer, or with benign prostatic tissue of the same dataset were tested using a t-test. p<0.05 was considered a significant variation in *CYP27A1* expression between two different prostate tissue types (see Tables 2-4 for p-values).
