# Supplementary material for: CYP27A1 Loss Dysregulates Cholesterol Homeostasis in Prostate Cancer
Source: Oxford University Press journal article supplement (doi:10.1158/0008-5472.can-16-2738), 2017-01-27
Supplement: 00085472can162738-sup-172796_1_supp_3809024_fj9y07.docx [file 00085472can162738-sup-172796_1_supp_3809024_fj9y07.docx]

**Supplementary Figure S2.** **Evaluation of CYP27A1 in PC cells**

**A)** Cell lysates were extracted from the following PC cell lines (DU145, PC3, LNCaP, 22RV1, LAPC4 and VCaP). Immunoblot analysis was then performed to analyze expression levels of CYP27A1 in each cell line. β-tubulin levels served as a loading control. The data shown is representative of three independent experiments. **B)** LNCaP or **C)** 22RV1 cells stably expressing CYP27A1 or GAL4 control were treated with an increasing dose of doxycycline (0, 10, 25 or 50 ng/ml). Seventy-two hours later cell lysates were harvested and immunoblot analysis performed for CYP27A1 and GAPDH (loading control). **D)** Schematic of the xenograft study **E)** 22RV1 tumors collected at the endpoint were extracted for protein and an immunoblot analysis was performed using the indicated antibodies.
