# Supplementary material for: CYP27A1 Loss Dysregulates Cholesterol Homeostasis in Prostate Cancer
Source: Oxford University Press journal article supplement (doi:10.1158/0008-5472.can-16-2738), 2017-01-27
Supplement: 00085472can162738-sup-172796_1_supp_3809025_1j9y07.docx [file 00085472can162738-sup-172796_1_supp_3809025_1j9y07.docx]

**Supplementary Figure S3. CYP27A1 overexpression does not lead to 1,25-dihydroxyvitamin D3 production in prostate cancer cells**

LNCaP and 22Rv1 cells stably expressing Gal4 (Control) and CYP27A1 were plated in 12-well plates overnight. Expression of Gal4 and CYP27A1 was induced by treatment with increasing concentrations of doxycycline (0, 0.025, 0.1, 0.5, 1, and 2 ug/ml) for 3 days. A separate set of cells were treated with increasing concentrations of 1, 25-dihydroxyvitamin D3 (1, 25 VitD3) as positive controls. Expression of CYP27A1 and VDR target genes (TMPRSS2 and CYP24A1) was analyzed by qPCR.
