# Supplementary material for: CYP27A1 Loss Dysregulates Cholesterol Homeostasis in Prostate Cancer
Source: Oxford University Press journal article supplement (doi:10.1158/0008-5472.can-16-2738), 2017-01-27
Supplement: 00085472can162738-sup-172796_1_supp_3809026_1j9y07.docx [file 00085472can162738-sup-172796_1_supp_3809026_1j9y07.docx]

**Supplementary Figure S4. 27HC inhibits the growth of androgen-sensitive and -insensitive PC cell lines**

**A)** VCaP cells were plated in 96-well plates. The next day the cells were treated with the indicated doses of 27HC. Seven days later the cells were harvested and DNA content measured by staining with the DNA dye Hoechst 33258. **B)** VCaP cells were plated in 6 cm dishes. The next day the cells were treated with 10 μM of 27HC. Cells were then harvested at the indicated time points. Whole-cell extracts were subjected to western blot analysis for C-PARP. GAPDH was used as a loading control. **C)** VCaP cells were plated in 6 cm dishes. Twenty-four hours later the cells were treated with the indicted doses of 27HC. Seventy-two hours later the cells were harvested and total cell lysates extracted. The expression of C-PARP was then evaluated with immunoblot analysis. GAPDH was used as a loading control. **D)** DU145 cells were plated in 96-well plates and treated as described for VCaP cells in A. Seven days later the cells were harvested and final DNA content determined as in A. **E)** DU145 cells were plated in 6 cm dishes and treated as described for VCaP cells in B. Whole-cell extracts were subjected to western blot analysis for p27. GAPDH was used as a loading control. **F)** DU145 cells were plated in 6 cm dishes and treated as described for VCaP cells in C. Whole-cell extracts were subjected to western blot analysis for p27. GAPDH was used as a loading control.
