# Supplementary material for: CYP27A1 Loss Dysregulates Cholesterol Homeostasis in Prostate Cancer
Source: Oxford University Press journal article supplement (doi:10.1158/0008-5472.can-16-2738), 2017-01-27
Supplement: 00085472can162738-sup-172796_1_supp_3809028_pj9y08.docx [file 00085472can162738-sup-172796_1_supp_3809028_pj9y08.docx]

**Supplementary Figure S6.** **Inhibition/downregulation of SREBP2/LDLR axis inhibits PC cell growth**

**A)** LNCaP cells were transiently transfected with mock or siRNAs targeting a negative control (Si_luc) or LDLR (A or C). Two days later, cells were treated for 24 hours +/− 10 nM R1881. Whole-cell extracts were subjected to western blot analysis for LDLR. β-Tubulin was used as a loading control. **B)** LNCaP cells were transfected as described above with Si_luc or siRNAs targeting LDLR (A or C) and treated with +/− 10 nM R1881 for 24 hours. The expression of LDLR was assessed using qPCR. Results displayed represent fold induction above vehicle. **C)** LNCaP cells were reverse transfected with indicated siRNAs in 96-well plates. Two days after transfection, cells were treated with the indicated doses of R1881. Seven days later final cell number was determined via staining with the DNA dye Hoechst 33258. **D)** A model explaining how the CYP27A1/27HC axis controls cholesterol homeostasis and PC tumor growth.
